# Supplementary material for: PRIMAP-crf: UNFCCC CRF data in IPCC 2006 categories
Source: Copernicus journal article supplement (doi:10.5194/essd-2018-3), 2018-03-09
Supplement: Supplementary file 1 [file CRF_tables_key_IPCC2006.xlsx]

## Sheet: Sheet1
					Gases								Pollutants
CRF Table	Table Name / Content	Relevant IPCC2006 Categories	IPCC 2006 Categories read-in	M-Categories read-in	CO2	CH4	N2O	HFCs	PFCs	SF6	NF3	KYOTOGHG	NOx	CO	NMVOC	SO2
Table1s1	Sectoral Report for Energy (1)	1,1A, 1A[1-3] and sub-categories	1; 1A; 1A1; 1A1A; 1A1B; 1A1C; 1A2; 1A2A; 1A2B; 1A2C; 1A2D; 1A2E; 1A2F; 1A2M; 1A3; 1A3A; 1A3B; 1A3C; 1A3D; 1A3E		x	x	x						x	x	x	x
Table1s2	Sectoral Report for Energy (2)	1A4, 1A5, 1C, and sub-categories International Bunkers and multilateral operations	1A4; 1A4A; 1A4B; 1A4C; 1A5; 1A5A; 1A5B; 1C; 1C1; 1C2; 1C3;	MBK; MBKA; MBKM; MMULTIOP; MBIO	x	x	x						x	x	x	x
Table1.A(a)s1	Background data = fuel combustion ativities; sectoral approach	1A and 1A1 by sector and fuel type	1A; 1A1; 1A1A; 1A1B; 1A1C		x	x	x
Table1.A(a)s2	"	1A2 by sector and fuel type	1A2; 1A2[A-L]	M1A2M1; M1A2M2	x	x	x
Table1.A(a)s3	"	1A3 by sector and fuel type	1A3; 1A3[A-E]		x	x	x
Table1.A(a)s4	"	1A4 and 1A5 by sector and fuel type	1A4; 1A4[A-C]; 1A5		x	x	x
Table1.A(b)	CO2 from fuel combustion - reference approach
Table1.A(c)	Comparison of CO2 emissions from fuel combustion
Table1.A(d)	Feedstocks, reductants and other non-energy use of fuels
Table1.B.1	Solid fuels; sectoral detail	1B1 and sub-categories	1B1A; 1B1A1; 1B1A11; 1B1A12; 1B1A13; 1B1A2; 1B1A21; 1B1A22	M1B3A1; M1B3A2	x	x
Table1.B.2	Oil, natural gas and other emissions from energy production; sectoral detail	1B2A; 1B2B; 1B3	1B2A3[1-6]; 1B2B3[1-6]; 1B2A1; 1B2A2; 1B2B1; 1B2B2	M1B2C; M1B2C1; M1B2C2; M1B3B	x	x	x
Table1.C	CO2 Transport and storage	1C1 and sub-categories	1C1; 1C1A; 1C1B; 1C1C; 1C2; 1C2A; 1C2B; 1C3		x
Table1.D	International aviation and international navigation (international bunkers) and multilateral operations	International bunkers by fuel type		MBKA; MBKB; MMULTIOP	x	x	x
Table2(I)s1	Sectoral Report for IPPU	2, 2A-C and sub-categories	2; 2A; 2A[1-4]; 2B; 2B[1-10]; 2C; 2C[1-7]		x	x	x	x	x	x	x		x	x	x	x
Table2(I)s2	Sectoral Report for IPPU	2D - 2H and sub-categories	2D; 2D1; 2D2; 2E; 2E[1-5]; 2F; 2F[1-6]; 2G; 2G[1-4]; 2H	M2D34	x	x	x	x	x	x	x		x	x	x	x
Table2(I).A-Hs1	Emissions of CO2, CH4, and N2O
Table2(I).A-Hs2	Emissions of CO2, CH4, and N2O		2D3; 2H[1-3]	M2D4A, M2D4B	x	x	x
Table2(II)	Emissions of HFCs, PFCs, SF6 AND NF3		2; 2B; 2B9; 2B10 2C; 2C3; 2C4; 2C7; 2E; 2E[1-5]; 2F; 2F[1-6]; 2G; 2G1; 2G2; 2G4; 2H; 2H[1-3]					x	x	x	x
Table2(II)B-Hs1	sources of fluorinated substances
Table2(II)B-Hs2	sources of fluorinated substances
Table3s1	Sectoral report for Agriculture	3A; 3C	3A1; 3C6	MAG; M3A2CATTLE; M3A2SHEEP; M3A2SWINE; M3A2OTHER	x	x	x						x	x	x
Table3s2	Sectoral report for Agriculture	3A; 3C	3C2; 3C3; 3C7	M3C1AGSAV; M3C1AGRES; M3D2AG[A&B]	x	x	x						x	x	x
Table3.As1	Enteric Fermentation
Table3.As2	Enteric Fermentation
Table3.B(a)s1	CH4 Emissions from Manure Management
Table3.B(a)s2	CH4 Emissions from Manure Management
Table3.B(b)	N2O Emissions from Manure Management
Table3.C	Rice Cultivation
Table3.D	Direct and indirect N2O emissions from agricultural soils			M3C4AG; M3C5AG; M3C5AG[A&B]			x
Table3.E	Prescribed burning of savannas
Table3.F	Field burning of agricultural residues(1)
Table3.G-I	CO2 emissions from liming, urea application and other carbon-containing fertilizers
Table4	Sectoral overview for LULUCF	All LULUCF categories, but not simple because retains old CRF structure and IPCC1996 categories	3D1	MLULUCF; M3D2LU; MCAT5B[all]	x	x	x						x	x	x
Table4.1	Areas and changes in areas between the previous and the current inventory year(1)
Table4.A	forest land	3B1	3B1; 3B1A; 3B1B	M3B1B[1-5]	x
Table4.B	crop land	3B2	3B2; 3B2A; 3B2B	M3B2B[1-5]	x
Table4.C	grassland	3B3	3B3; 3B3A; 3B3B	M3B3B[1-5]	x
Table4.D	wetlands	3B4	3B4; 3B4A; 3B4B	M3B4B[1-5]	x
Table4.E	settlements	3B5	3B5; 3B5A; 3B5B	M3B5B[1-5]	x
Table4.F	other land	3B6	3B6; 3B6A; 3B6B	M3B6B[1-5]	x
Table4(I)	Direct nitrous oxide (N2O) emissions from nitrogen (N) inputs(1) to managed soils	3C4		M3C4LUA[type]			x
Table4(II)	Emissions and removals from drainage and rewetting and other management of organic and mineral soils	3C8		M3C8A[type]	x	x	x
Table4(III)	Direct nitrous oxide (N2O) emissions from nitrogen (N) mineralization/immobilization associated with loss/gain of soil organic matter resulting from change of land use or management of mineral soils(1)	3C4		M3C4LUB[type]			x
Table4(IV)	Indirect nitrous oxide (N2O) emissions from managed soils(1)(2)	3C5		M3C5LUA; M3C5LUB			x
Table4(V)	Biomass Burning(1)	3C1		M3C1LU; M3C1LU[type]	x	x	x
Table4.Gs1	Harvested wood products (HWP)(1)	3D1			x
Table4.Gs2	Harvested wood products (HWP)(1)	3D1
Table5	Sectoral report for Waste	4 and subcategories	4; 4A; 4A[1-3]; 4B; 4C; 4C[1-2]; 4D; 4D[1-2]; 4E		x	x	x						x	x	x	x
Table5.A	solid waste disposal
Table5.B	biological treatment of solid waste
Table5.C	incineration and open burning of waste
Table5.D	wastewater treatment and discharge
Summary1.As1	Summary Report for GHG inventories	0, 1, 2	0, 1, 1A, 1A[1-5]; 1B; 1B[1-2]; 1C1; 2; 2[A-H]		x	x	x	x	x	x	x		x	x	x	x
Summary1.As2	Summary Report for GHG inventories	4 and 5	3A1; 3A2; 3C2; 3C3; 3C7; 4; 4A; 4B; 4C; 4D; 4E; 5	MAG; MCAT5B[1-6]; M3D1	x	x	x	x	x	x	x		x	x	x	x
Summary1.As3	Summary Report for GHG inventories	international bunkers and multilateral operations		M1; M1A; M1B; MMULITOP; MBIO	x	x	x	x	x	x	x		x	x	x	x
Summary2	summary report for CO2e emissions
Summary3s1	summary methods and emissions factors
Summary3s2	summary methods and emissions factors
Table6	indirect emissions of N2O and CO2
Table7	sumary overview for key categories
Table8s1	Recalculated data (1)
Table8s2	Recalculated data (2)
Table8s3	Recalculated data (3)
Table8s4	Recalculated data (4)
Table9	completeness - info. on notation keys
Table10s1	Emissions trends - CO2e	Top level	0; 1; 1A; 1A[1-5]; 1B; 1C1; 2; 2[A-H]; 3C2; 3C3; 3C7; 3D1; 3D2LU; 4; 4[A-E]; 5	MAG; MLULUCF; MCAT5B[1-6]; M3D2LU MBK; MBKA; MBKM; MMULTIOP; MBIO; M0N2OIND; M0CO2IND; M0EL; MOELINDRCT; M0INDRCT								x
Table10s2	Emissions trends - CO2	Top level			x
Table10s3	Emissions trends - CH4	Top level				x
Table10s4	Emissions trends - N2O	Top level					x
Table10s5	Emissions trends - F-gases	Top level						x	x	x	x
Table10s6	Summary emissions trends (all gas, major sectors only)	Top level			x	x	x	x	x	x	x
