# Supplementary material for: PRIMAP-crf: UNFCCC CRF data in IPCC 2006 categories
Source: Copernicus journal article supplement (doi:10.5194/essd-2018-3), 2018-03-09
Supplement: Supplementary file 2 [file PRIMAP_EMMOD_GWPs.xls]

## Sheet: Summary
Gas	SAR	AR4	AR5	AR5CCF		Key
CO2	1	1	1	1		No values provided in IPCC report
CH4	21	25	28	34		From AR4
N2O	310	298	265	298		Assumption
CFC11	3800	4750	4660	5352		From AR5
CFC12	8100	10900	10200	11547
CFC13	14400	14400	13900	15451
CFC113	4800	6130	5820	6586
CFC114	10000	10000	8590	9615
CFC115	7370	7370	7670	8516
HALON1301	5400	7140	6290	7154
HALON1211	1890	1890	1750	2070
HALON2402	1640	1640	1470	1734
CCL4	1400	1400	1730	2019
CH3BR	5	5	2	3
CH3CCL3	100	146	160	193
HCFC22	1500	1810	1760	2106
HCFC123	90	77	79	96
HCFC124	470	609	527	635
HCFC141B	725	725	782	938
HCFC142B	1800	2310	1980	2345
HCFC225CA	122	122	127	155
HCFC225CB	595	595	525	633
HFC23	11700	14800	12400	13856
HFC32	650	675	677	817
HFC41	150	92	116	141
HFC125	2800	3500	3170	3691
HFC134	1000	1100	1120	1337
HFC134A	1300	1430	1300	1549
HFC143	300	353	328	397
HFC143A	3800	4470	4800	5508
HFC152	NaN	53	16	20
HFC152A	140	124	138	167
HFC161	4	4	4	4
HFC227EA	2900	3220	3350	3860
HFC227A	2900	3220	3220	3220
HFC236CB	1210	1210	1210	1438
HFC236EA	1330	1330	1330	1596
HFC236FA	6300	9810	8060	8998
HFC245CA	560	693	716	863
HFC245FA	1030	1030	858	1032
HFC365MFC	794	794	804	966
HFC4310	1300	1640	1650	1952
SF6	23900	22800	23500	26087
NF3	17200	17200	16100	17885
CF4	6500	7390	6630	7349
C2F6	9200	12200	11100	12340
C3F8	7000	8830	8900	9878
CC3F6	9200	9200	9200	10208
CC4F8	8700	10300	9540	10592
C4F10	7000	8860	9200	10213
C5F12	7500	9160	8550	9484
C6F14	7400	9300	7910	8780
C7F16	7400	9300	7820	8681
C10F18	7190	7190	7190	7977

## Sheet: SAR
0	a			From AR4	Assumption	From AR5
GAS-DEPENDENT CONVERSION FACTORS - ipcc1996 - sar
ENTITY	FACTORCODE	VALUE
CO2	GWP	1
CH4	GWP	21
N2O	GWP	310
CFC11	GWP	3800
CFC12	GWP	8100
CFC13	GWP	14400
CFC113	GWP	4800
CFC114	GWP	10000
CFC115	GWP	7370
HALON1301	GWP	5400
HALON1211	GWP	1890
HALON2402	GWP	1640
CCL4	GWP	1400
CH3BR	GWP	5
CH3CCL3	GWP	100
HCFC22	GWP	1500
HCFC123	GWP	90
HCFC124	GWP	470
HCFC141B	GWP	725
HCFC142B	GWP	1800
HCFC225CA	GWP	122
HCFC225CB	GWP	595
HFC23	GWP	11700
HFC32	GWP	650
HFC41	GWP	150
HFC125	GWP	2800
HFC134	GWP	1000
HFC134A	GWP	1300
HFC143	GWP	300
HFC143A	GWP	3800
HFC152	GWP	NaN
HFC152A	GWP	140
HFC161	GWP	4
HFC227EA	GWP	2900
HFC227A	GWP	2900
HFC236CB	GWP	1210
HFC236EA	GWP	1330
HFC236FA	GWP	6300
HFC245CA	GWP	560
HFC245FA	GWP	1030
HFC365MFC	GWP	794
HFC4310	GWP	1300
SF6	GWP	23900
NF3	GWP	17200
CF4	GWP	6500
C2F6	GWP	9200
C3F8	GWP	7000
CC3F6	GWP	9200
CC4F8	GWP	8700
C4F10	GWP	7000
C5F12	GWP	7500
C6F14	GWP	7400
C7F16	GWP	7400
C10F18	GWP	7190

## Sheet: AR4
0	a			Assumption	From AR5
GAS-DEPENDENT CONVERSION FACTORS - ipcc 2007 - ar4
ENTITY	FACTORCODE	VALUE
CO2	GWP	1
CH4	GWP	25
N2O	GWP	298
CFC11	GWP	4750
CFC12	GWP	10900
CFC13	GWP	14400
CFC113	GWP	6130
CFC114	GWP	10000
CFC115	GWP	7370
HALON1301	GWP	7140
HALON1211	GWP	1890
HALON2402	GWP	1640
CCL4	GWP	1400
CH3BR	GWP	5
CH3CCL3	GWP	146
HCFC22	GWP	1810
HCFC123	GWP	77
HCFC124	GWP	609
HCFC141B	GWP	725
HCFC142B	GWP	2310
HCFC225CA	GWP	122
HCFC225CB	GWP	595
HFC23	GWP	14800
HFC32	GWP	675
HFC41	GWP	92
HFC125	GWP	3500
HFC134	GWP	1100
HFC134A	GWP	1430
HFC143	GWP	353
HFC143A	GWP	4470
HFC152	GWP	53
HFC152A	GWP	124
HFC161	GWP	4
HFC227EA	GWP	3220
HFC227A	GWP	3220
HFC236CB	GWP	1210
HFC236EA	GWP	1330
HFC236FA	GWP	9810
HFC245CA	GWP	693
HFC245FA	GWP	1030
HFC365MFC	GWP	794
HFC4310	GWP	1640
SF6	GWP	22800
NF3	GWP	17200
CF4	GWP	7390
C2F6	GWP	12200
C3F8	GWP	8830
CC3F6	GWP	9200
CC4F8	GWP	10300
C4F10	GWP	8860
C5F12	GWP	9160
C6F14	GWP	9300
C7F16	GWP	9300
C10F18	GWP	7190

## Sheet: AR5
0	a			Assumption		No values provided in IPCC report
GAS-DEPENDENT CONVERSION FACTORS - ipcc 2013 - ar5
ENTITY	FACTORCODE	VALUE
CO2	GWP	1
CH4	GWP	28
N2O	GWP	265
CFC11	GWP	4660
CFC12	GWP	10200
CFC13	GWP	13900
CFC113	GWP	5820
CFC114	GWP	8590
CFC115	GWP	7670
HALON1301	GWP	6290
HALON1211	GWP	1750
HALON2402	GWP	1470
CCL4	GWP	1730
CH3BR	GWP	2
CH3CCL3	GWP	160
HCFC22	GWP	1760
HCFC123	GWP	79
HCFC124	GWP	527
HCFC141B	GWP	782
HCFC142B	GWP	1980
HCFC225CA	GWP	127
HCFC225CB	GWP	525
HFC23	GWP	12400
HFC32	GWP	677
HFC41	GWP	116
HFC125	GWP	3170
HFC134	GWP	1120
HFC134A	GWP	1300
HFC143	GWP	328
HFC143A	GWP	4800
HFC152	GWP	16
HFC152A	GWP	138
HFC161	GWP	4
HFC227EA	GWP	3350
HFC227A	GWP	3220
HFC236CB	GWP	1210
HFC236EA	GWP	1330
HFC236FA	GWP	8060
HFC245CA	GWP	716
HFC245FA	GWP	858
HFC365MFC	GWP	804
HFC4310	GWP	1650
SF6	GWP	23500
NF3	GWP	16100
CF4	GWP	6630
C2F6	GWP	11100
C3F8	GWP	8900
CC3F6	GWP	9200
CC4F8	GWP	9540
C4F10	GWP	9200
C5F12	GWP	8550
C6F14	GWP	7910
C7F16	GWP	7820
C10F18	GWP	7190

## Sheet: AR5CCF
0	a			Assumption		No values provided in IPCC report
GAS-DEPENDENT CONVERSION FACTORS - ipcc 2013 - ar5 with climate-carbon feedbacks
ENTITY	FACTORCODE	VALUE
CO2	GWP	1
CH4	GWP	34
N2O	GWP	298
CFC11	GWP	5352
CFC12	GWP	11547
CFC13	GWP	15451
CFC113	GWP	6586
CFC114	GWP	9615
CFC115	GWP	8516
HALON1301	GWP	7154
HALON1211	GWP	2070
HALON2402	GWP	1734
CCL4	GWP	2019
CH3BR	GWP	3
CH3CCL3	GWP	193
HCFC22	GWP	2106
HCFC123	GWP	96
HCFC124	GWP	635
HCFC141B	GWP	938
HCFC142B	GWP	2345
HCFC225CA	GWP	155
HCFC225CB	GWP	633
HFC23	GWP	13856
HFC32	GWP	817
HFC41	GWP	141
HFC125	GWP	3691
HFC134	GWP	1337
HFC134A	GWP	1549
HFC143	GWP	397
HFC143A	GWP	5508
HFC152	GWP	20
HFC152A	GWP	167
HFC161	GWP	4
HFC227EA	GWP	3860
HFC227A	GWP	3220
HFC236CB	GWP	1438
HFC236EA	GWP	1596
HFC236FA	GWP	8998
HFC245CA	GWP	863
HFC245FA	GWP	1032
HFC365MFC	GWP	966
HFC4310	GWP	1952
SF6	GWP	26087
NF3	GWP	17885
CF4	GWP	7349
C2F6	GWP	12340
C3F8	GWP	9878
CC3F6	GWP	10208
CC4F8	GWP	10592
C4F10	GWP	10213
C5F12	GWP	9484
C6F14	GWP	8780
C7F16	GWP	8681
C10F18	GWP	7977
